# Supplementary material for: TRPM2-mediated rise in mitochondrial Zn2+ promotes palmitate-induced mitochondrial fission and pancreatic β-cell death in rodents
Source: PubMed Central journal article supplement (PMC5686341; doi:10.1038/cdd.2017.118), 2017-07-28
Supplement: cdd2017118x1.pdf [file cdd2017118x1.pdf]

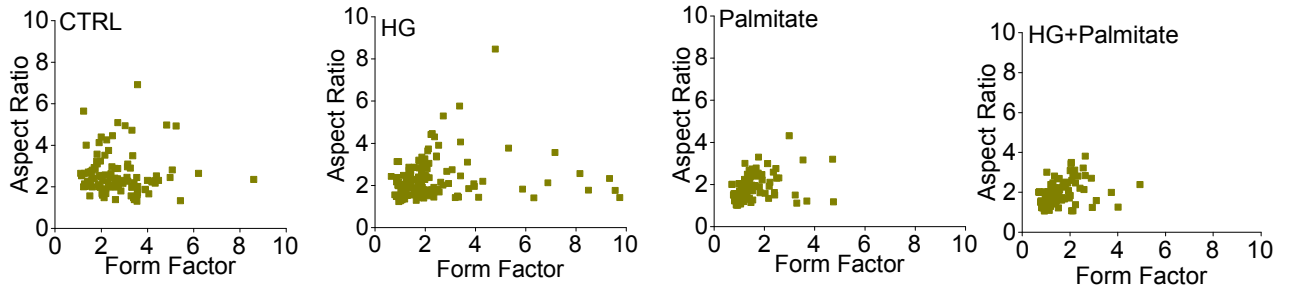

**Supplementary Figure 1.** Representative plots of form factor against aspect ratio of mitochondria from one image of a cell for each of the indicated conditions.

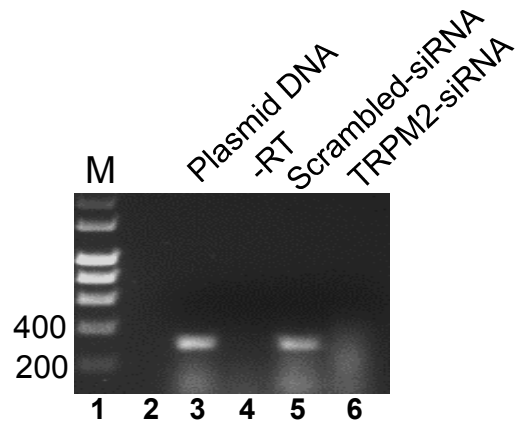

**Supplementary Figure 2. Demonstration of silencing of TRPM2 mRNA expression by RNAi.** Lane 1, HyperLadder I, Bioline; Lane 3, positive control; PCR product from TRPM2 plasmid DNA; Lanes 4-6, PCR products from mRNA isolated from INS1-832/13 cells (lane 4) and cells transfected with scrambled siRNA (lane 5) or TRPM2-siRNA (lanes 6). Lane 4 represents minus reverse transcriptase (-RT) control. The results show absence of TRPM2 band (lane 6) in TRPM2 siRNA transfected samples, but not scrambled siRNA controls (lane 5).

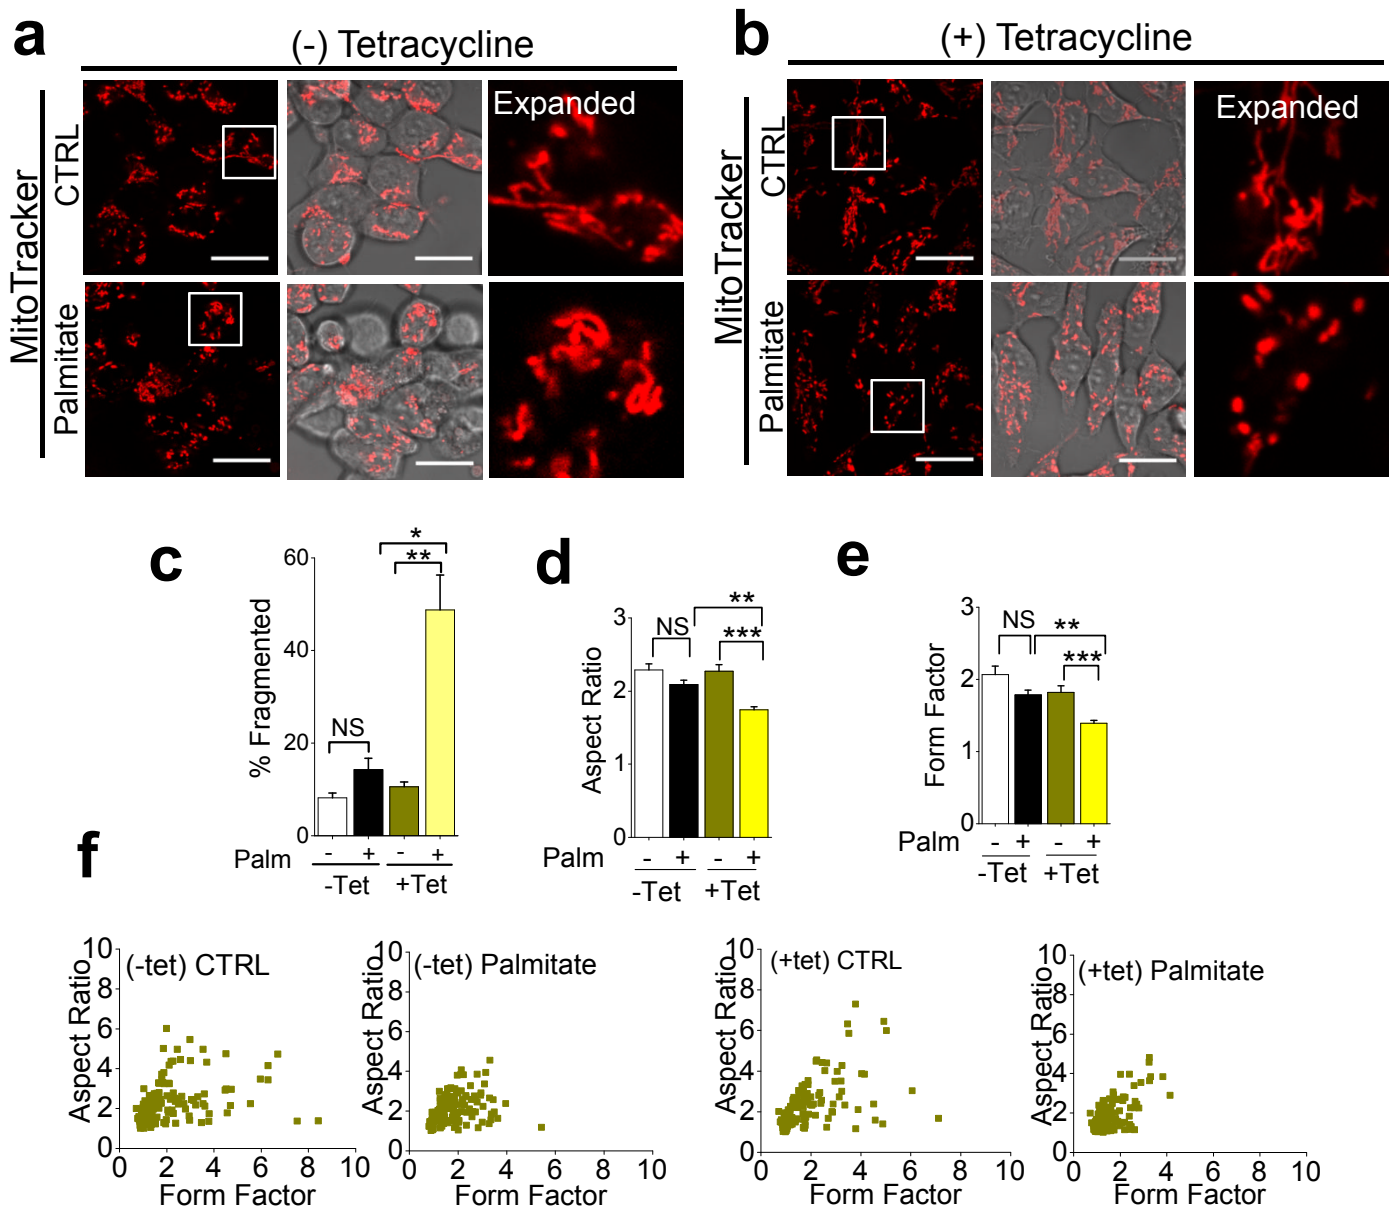

**Supplementary Figure 3. Heterologous expression of TRPM2 channels enables palmitate to induce mitochondrial fragmentation in HEK-293 cells.** (a-b) HEK-293-TRPM2<sup>tet</sup> cells were either not treated or treated with tetracycline (1  $\mu$ g/ml) to induce expression of TRPM2 channels. Cells were then treated with medium alone (CTRL) or medium containing 500  $\mu$ M palmitate for 12 hrs at 37°C. Cells were then stained with MitoTracker Red and imaged. Representative confocal images are shown. (c-e) show mean  $\pm$  SEM data for percent cells showing fragmentation (c), and changes in the aspect ratio (d) and form factor (e) of mitochondria; n=3. Scale bars in images: 10  $\mu$ m. In all bar charts, \*  $p < 0.05$ , \*\*  $p < 0.01$ , \*\*\*  $p < 0.001$ , NS, not significant; one-way Anova with post-hoc Tukey test. (f) shows representative plots of form factor against aspect ratio of mitochondria from one image of a cell for each of the indicated conditions.

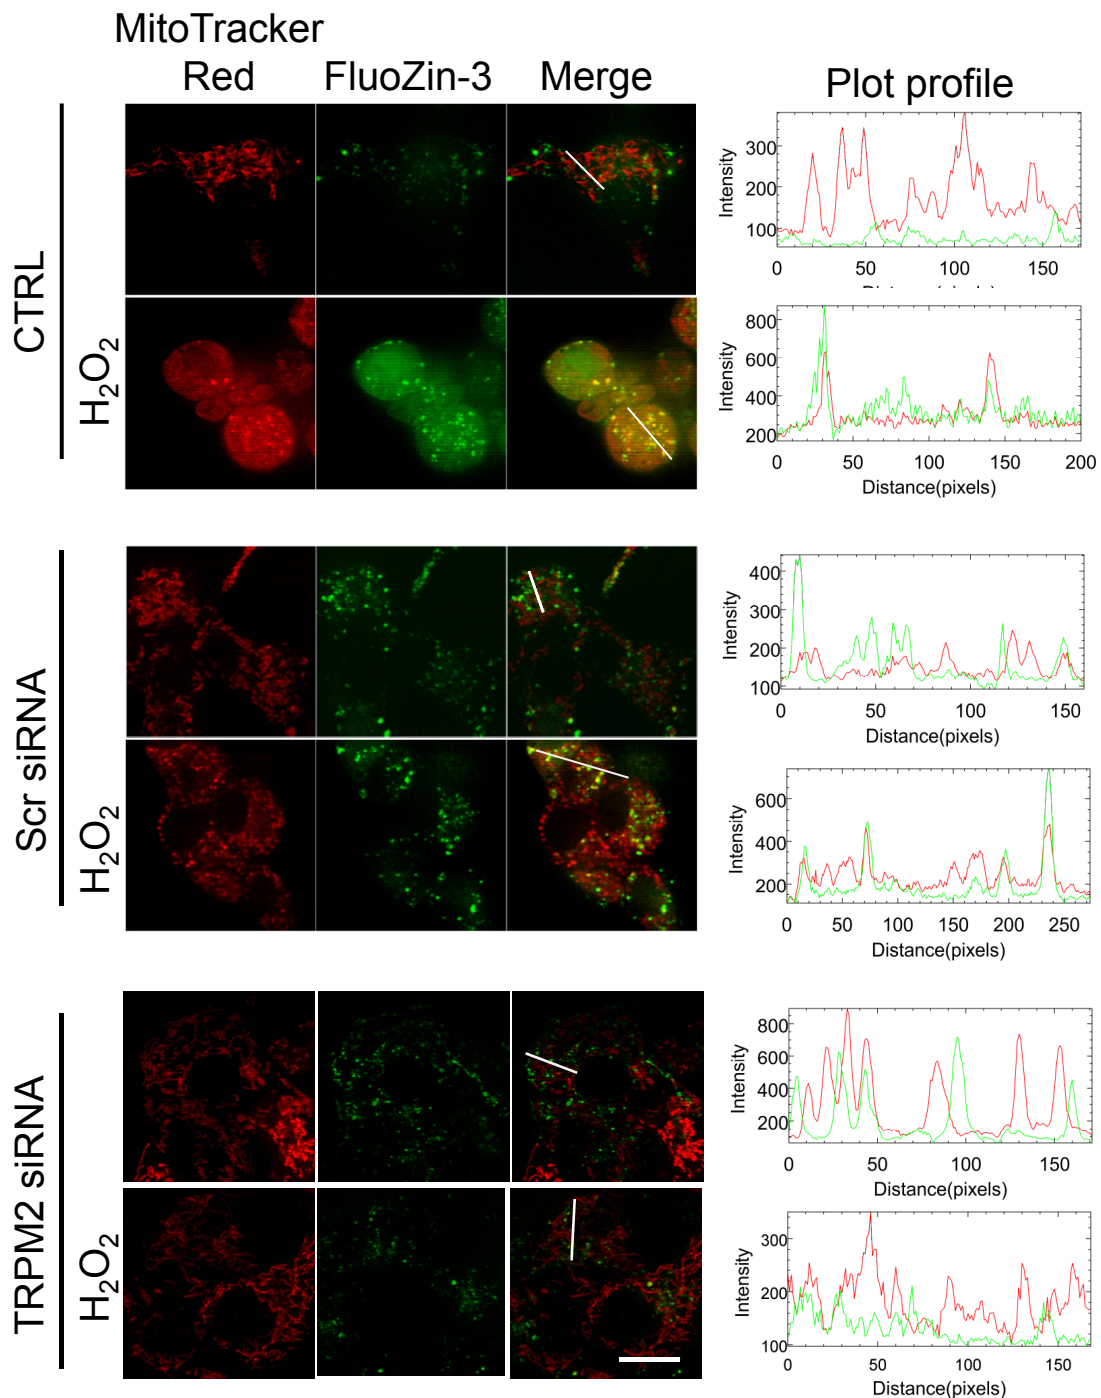

**Supplementary Figure 4. Direct activation of TRPM2 channels with  $H_2O_2$  leads to  $Zn^{2+}$  accumulation in mitochondria and mitochondrial fragmentation.** INS1-832/13 cells were either not transfected (CTRL) or transfected with scrambled (Scr) siRNA or TRPM2 siRNA. Transfected cells were loaded with FluoZin-3-AM, exposed to medium alone or medium containing 50  $\mu M$   $H_2O_2$  for 1 hr, before staining the mitochondria with MitoTracker Red. Representative FluoZin-3 (green) and MitoTracker Red (red) stained cells and the corresponding merged images are shown. On far right are shown pixel intensity of green and red puncta as a function of distance along the white line shown in merged images. The results show that TRPM2 siRNA, but not Scr siRNA, prevents  $H_2O_2$ -induced mitochondrial fragmentation and increased localisation of  $Zn^{2+}$  to mitochondria (as evident from yellow puncta in merged images and the plot profiles). Representative data from three independent experiments are shown.

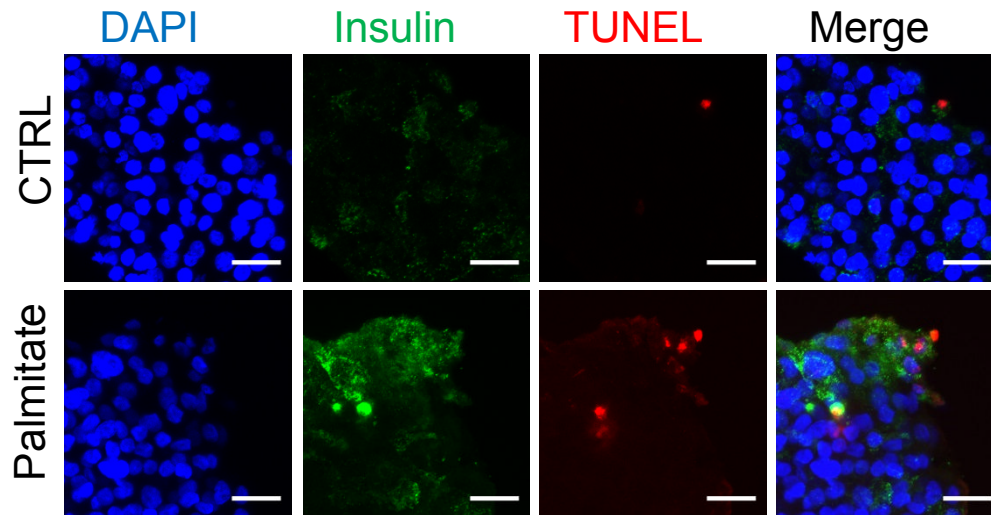

**Supplementary Figure 5. Representative images of human islet sections showing palmitate-induced apoptosis.** Human islets were exposed to Opti-Mem or Opti-Mem supplemented with palmitate:BSA complex (500  $\mu$ M:0.95%) for 7 days at 37°C in a humidified atmosphere containing 5% CO<sub>2</sub>/95% air. Islets were fixed, sectioned, stained and imaged for Insulin and TUNEL stain as described in Materials and Methods section of the main text.
